# Supplementary material
Source: MDPI journal article supplement (https://www.mdpi.com/2076-3417/12/9/4452)

Video S1: ISVS-A on youtube: In-Situ Visualization System—Temple visualization

[https://drive.google.com/file/d/1u8Ta0vTCOdj\\_aGNDFkcDcEED5vLoVeV3/view?usp=sharing](https://drive.google.com/file/d/1u8Ta0vTCOdj_aGNDFkcDcEED5vLoVeV3/view?usp=sharing)

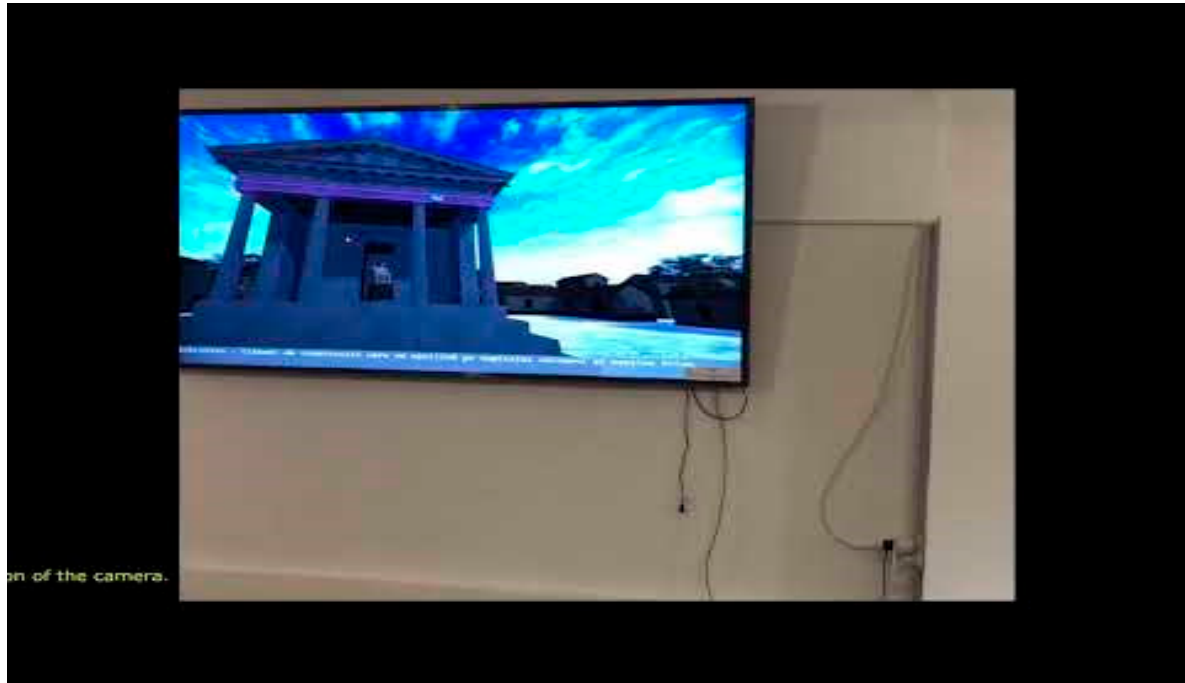

Video S2: ISVS-B on youtube: In-Situ Visualization System—3D Scanned Artifacts Visualization

[https://drive.google.com/file/d/1Ww-ZDsWYfQLpkGZizIMK\\_0-4hHZI-5N6/view?usp=sharing](https://drive.google.com/file/d/1Ww-ZDsWYfQLpkGZizIMK_0-4hHZI-5N6/view?usp=sharing)

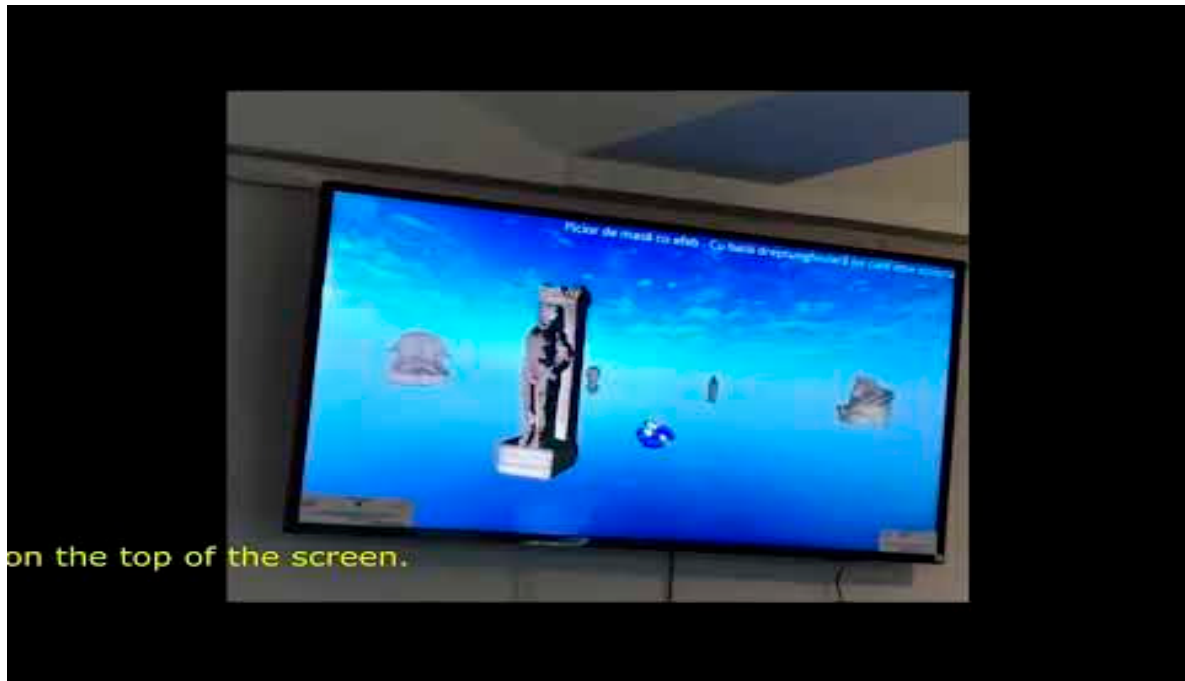

Supplement: s1 [file s1]
